# Supplementary material for: Celecoxib reverses the glioblastoma chemo-resistance to temozolomide through mitochondrial metabolism
Source: Aging (Albany NY). 2021 Sep 8;13(17):21268–82. doi: 10.18632/aging.203443 (PMC8457578; doi:10.18632/aging.203443)
Supplement: Supplementary Table 1 [file aging-13-203443-s001.xls]

## Sheet: 2way ANOVA of LN18 dose climbin
Supplementary Table 1. Statistical analysis of celecoxib dose climbing experiment.
Parameter
Table Analyzed	LN18 dose climbing experiment
Two-way ANOVA
Source of Variation	% of total variation	P value
Interaction	25.16	< 0.0001
Column Factor	49.9	< 0.0001
Row Factor	22.2	< 0.0001
Source of Variation	P value summary	Significant?
Interaction	***	Yes
Column Factor	***	Yes
Row Factor	***	Yes
Source of Variation	Df	Sum-of-squares	Mean square	F
Interaction	28	6.52	0.2329	26.13
Column Factor	7	12.93	1.848	207.3
Row Factor	4	5.753	1.438	161.4
Residual	80	0.7131	0.008914
Number of missing values	0
Bonferroni posttests
Blank control vs TMZ (250uM)
Row Factor	Blank control	TMZ (250uM)	Difference	95% CI of diff.
1	0.829	0.7819	-0.04717	-0.3346 to 0.2403
2	1.349	1.15	-0.1987	-0.4862 to 0.08878
3	1.494	1.31	-0.184	-0.4715 to 0.1035
4	1.64	1.677	0.03627	-0.2512 to 0.3237
5	2.082	1.981	-0.1006	-0.3880 to 0.1869
Row Factor	Difference	t	P value	Summary
1	-0.04717	0.6119	P > 0.05	ns
2	-0.1987	2.578	P > 0.05	ns
3	-0.184	2.387	P > 0.05	ns
4	0.03627	0.4705	P > 0.05	ns
5	-0.1006	1.305	P > 0.05	ns
Blank control vs Celecoxib (10uM)
Row Factor	Blank control	Celecoxib (10uM)	Difference	95% CI of diff.
1	0.829	0.8328	0.003733	-0.2837 to 0.2912
2	1.349	1.175	-0.1739	-0.4614 to 0.1136
3	1.494	1.39	-0.104	-0.3915 to 0.1835
4	1.64	1.679	0.03877	-0.2487 to 0.3262
5	2.082	1.954	-0.128	-0.4155 to 0.1594
Row Factor	Difference	t	P value	Summary
1	0.003733	0.04843	P > 0.05	ns
2	-0.1739	2.256	P > 0.05	ns
3	-0.104	1.349	P > 0.05	ns
4	0.03877	0.5029	P > 0.05	ns
5	-0.128	1.661	P > 0.05	ns
Blank control vs Celecoxib (20uM)
Row Factor	Blank control	Celecoxib (20uM)	Difference	95% CI of diff.
1	0.829	0.8006	-0.02847	-0.3159 to 0.2590
2	1.349	1.31	-0.03874	-0.3262 to 0.2487
3	1.494	1.421	-0.0729	-0.3604 to 0.2146
4	1.64	1.693	0.05258	-0.2349 to 0.3401
5	2.082	1.928	-0.1536	-0.4410 to 0.1339
Row Factor	Difference	t	P value	Summary
1	-0.02847	0.3693	P > 0.05	ns
2	-0.03874	0.5026	P > 0.05	ns
3	-0.0729	0.9457	P > 0.05	ns
4	0.05258	0.6821	P > 0.05	ns
5	-0.1536	1.992	P > 0.05	ns
Blank control vs Celecoxib (30uM)
Row Factor	Blank control	Celecoxib (30uM)	Difference	95% CI of diff.
1	0.829	0.8135	-0.01557	-0.3030 to 0.2719
2	1.349	1.311	-0.038	-0.3255 to 0.2495
3	1.494	1.428	-0.06593	-0.3534 to 0.2215
4	1.64	1.662	0.02113	-0.2663 to 0.3086
5	2.082	1.932	-0.15	-0.4375 to 0.1375
Row Factor	Difference	t	P value	Summary
1	-0.01557	0.2019	P > 0.05	ns
2	-0.038	0.493	P > 0.05	ns
3	-0.06593	0.8553	P > 0.05	ns
4	0.02113	0.2741	P > 0.05	ns
5	-0.15	1.946	P > 0.05	ns
Blank control vs Celecoxib (60uM)
Row Factor	Blank control	Celecoxib (60uM)	Difference	95% CI of diff.
1	0.829	0.7992	-0.02987	-0.3173 to 0.2576
2	1.349	1.029	-0.3196	-0.6070 to -0.03209
3	1.494	0.9967	-0.4973	-0.7848 to -0.2098
4	1.64	0.8143	-0.8261	-1.114 to -0.5387
5	2.082	0.8271	-1.255	-1.542 to -0.9672
Row Factor	Difference	t	P value	Summary
1	-0.02987	0.3874	P > 0.05	ns
2	-0.3196	4.146	P<0.001	***
3	-0.4973	6.451	P<0.001	***
4	-0.8261	10.72	P<0.001	***
5	-1.255	16.28	P<0.001	***
Blank control vs Celecoxib (90uM)
Row Factor	Blank control	Celecoxib (90uM)	Difference	95% CI of diff.
1	0.829	0.8102	-0.01887	-0.3063 to 0.2686
2	1.349	0.9092	-0.4396	-0.7270 to -0.1521
3	1.494	0.8237	-0.6703	-0.9578 to -0.3828
4	1.64	0.7299	-0.9105	-1.198 to -0.6231
5	2.082	0.6724	-1.409	-1.697 to -1.122
Row Factor	Difference	t	P value	Summary
1	-0.01887	0.2447	P > 0.05	ns
2	-0.4396	5.702	P<0.001	***
3	-0.6703	8.695	P<0.001	***
4	-0.9105	11.81	P<0.001	***
5	-1.409	18.28	P<0.001	***
Blank control vs Celecoxib (120uM)
Row Factor	Blank control	Celecoxib (120uM)	Difference	95% CI of diff.
1	0.829	0.7984	-0.03063	-0.3181 to 0.2569
2	1.349	0.7276	-0.6211	-0.9086 to -0.3336
3	1.494	0.6982	-0.7958	-1.083 to -0.5083
4	1.64	0.44	-1.2	-1.488 to -0.9129
5	2.082	0.3986	-1.683	-1.971 to -1.396
Row Factor	Difference	t	P value	Summary
1	-0.03063	0.3973	P > 0.05	ns
2	-0.6211	8.057	P<0.001	***
3	-0.7958	10.32	P<0.001	***
4	-1.2	15.57	P<0.001	***
5	-1.683	21.84	P<0.001	***
TMZ (250uM) vs Celecoxib (10uM)
Row Factor	TMZ (250uM)	Celecoxib (10uM)	Difference	95% CI of diff.
1	0.7819	0.8328	0.0509	-0.2366 to 0.3384
2	1.15	1.175	0.0248	-0.2627 to 0.3123
3	1.31	1.39	0.08	-0.2075 to 0.3675
4	1.677	1.679	0.0025	-0.2850 to 0.2900
5	1.981	1.954	-0.02747	-0.3149 to 0.2600
Row Factor	Difference	t	P value	Summary
1	0.0509	0.6603	P > 0.05	ns
2	0.0248	0.3217	P > 0.05	ns
3	0.08	1.038	P > 0.05	ns
4	0.0025	0.03243	P > 0.05	ns
5	-0.02747	0.3563	P > 0.05	ns
TMZ (250uM) vs Celecoxib (20uM)
Row Factor	TMZ (250uM)	Celecoxib (20uM)	Difference	95% CI of diff.
1	0.7819	0.8006	0.0187	-0.2688 to 0.3062
2	1.15	1.31	0.16	-0.1275 to 0.4474
3	1.31	1.421	0.1111	-0.1764 to 0.3986
4	1.677	1.693	0.01631	-0.2712 to 0.3038
5	1.981	1.928	-0.053	-0.3405 to 0.2345
Row Factor	Difference	t	P value	Summary
1	0.0187	0.2426	P > 0.05	ns
2	0.16	2.075	P > 0.05	ns
3	0.1111	1.441	P > 0.05	ns
4	0.01631	0.2116	P > 0.05	ns
5	-0.053	0.6875	P > 0.05	ns
TMZ (250uM) vs Celecoxib (30uM)
Row Factor	TMZ (250uM)	Celecoxib (30uM)	Difference	95% CI of diff.
1	0.7819	0.8135	0.0316	-0.2559 to 0.3191
2	1.15	1.311	0.1607	-0.1268 to 0.4482
3	1.31	1.428	0.1181	-0.1694 to 0.4055
4	1.677	1.662	-0.01513	-0.3026 to 0.2723
5	1.981	1.932	-0.04943	-0.3369 to 0.2380
Row Factor	Difference	t	P value	Summary
1	0.0316	0.4099	P > 0.05	ns
2	0.1607	2.085	P > 0.05	ns
3	0.1181	1.532	P > 0.05	ns
4	-0.01513	0.1963	P > 0.05	ns
5	-0.04943	0.6413	P > 0.05	ns
TMZ (250uM) vs Celecoxib (60uM)
Row Factor	TMZ (250uM)	Celecoxib (60uM)	Difference	95% CI of diff.
1	0.7819	0.7992	0.0173	-0.2702 to 0.3048
2	1.15	1.029	-0.1209	-0.4083 to 0.1666
3	1.31	0.9967	-0.3133	-0.6008 to -0.02582
4	1.677	0.8143	-0.8624	-1.150 to -0.5749
5	1.981	0.8271	-1.154	-1.442 to -0.8666
Row Factor	Difference	t	P value	Summary
1	0.0173	0.2244	P > 0.05	ns
2	-0.1209	1.568	P > 0.05	ns
3	-0.3133	4.064	P<0.001	***
4	-0.8624	11.19	P<0.001	***
5	-1.154	14.97	P<0.001	***
TMZ (250uM) vs Celecoxib (90uM)
Row Factor	TMZ (250uM)	Celecoxib (90uM)	Difference	95% CI of diff.
1	0.7819	0.8102	0.0283	-0.2592 to 0.3158
2	1.15	0.9092	-0.2409	-0.5283 to 0.04661
3	1.31	0.8237	-0.4863	-0.7738 to -0.1988
4	1.677	0.7299	-0.9468	-1.234 to -0.6593
5	1.981	0.6724	-1.309	-1.596 to -1.021
Row Factor	Difference	t	P value	Summary
1	0.0283	0.3671	P > 0.05	ns
2	-0.2409	3.125	P < 0.05	*
3	-0.4863	6.308	P<0.001	***
4	-0.9468	12.28	P<0.001	***
5	-1.309	16.98	P<0.001	***
TMZ (250uM) vs Celecoxib (120uM)
Row Factor	TMZ (250uM)	Celecoxib (120uM)	Difference	95% CI of diff.
1	0.7819	0.7984	0.01654	-0.2709 to 0.3040
2	1.15	0.7276	-0.4224	-0.7099 to -0.1349
3	1.31	0.6982	-0.6118	-0.8992 to -0.3243
4	1.677	0.44	-1.237	-1.524 to -0.9492
5	1.981	0.3986	-1.583	-1.870 to -1.295
Row Factor	Difference	t	P value	Summary
1	0.01654	0.2146	P > 0.05	ns
2	-0.4224	5.479	P<0.001	***
3	-0.6118	7.936	P<0.001	***
4	-1.237	16.04	P<0.001	***
5	-1.583	20.53	P<0.001	***
Celecoxib (10uM) vs Celecoxib (20uM)
Row Factor	Celecoxib (10uM)	Celecoxib (20uM)	Difference	95% CI of diff.
1	0.8328	0.8006	-0.0322	-0.3197 to 0.2553
2	1.175	1.31	0.1352	-0.1523 to 0.4226
3	1.39	1.421	0.0311	-0.2564 to 0.3186
4	1.679	1.693	0.01381	-0.2737 to 0.3013
5	1.954	1.928	-0.02553	-0.3130 to 0.2619
Row Factor	Difference	t	P value	Summary
1	-0.0322	0.4177	P > 0.05	ns
2	0.1352	1.753	P > 0.05	ns
3	0.0311	0.4034	P > 0.05	ns
4	0.01381	0.1792	P > 0.05	ns
5	-0.02553	0.3312	P > 0.05	ns
Celecoxib (10uM) vs Celecoxib (30uM)
Row Factor	Celecoxib (10uM)	Celecoxib (30uM)	Difference	95% CI of diff.
1	0.8328	0.8135	-0.0193	-0.3068 to 0.2682
2	1.175	1.311	0.1359	-0.1516 to 0.4234
3	1.39	1.428	0.03807	-0.2494 to 0.3255
4	1.679	1.662	-0.01763	-0.3051 to 0.2698
5	1.954	1.932	-0.02197	-0.3094 to 0.2655
Row Factor	Difference	t	P value	Summary
1	-0.0193	0.2504	P > 0.05	ns
2	0.1359	1.763	P > 0.05	ns
3	0.03807	0.4938	P > 0.05	ns
4	-0.01763	0.2288	P > 0.05	ns
5	-0.02197	0.285	P > 0.05	ns
Celecoxib (10uM) vs Celecoxib (60uM)
Row Factor	Celecoxib (10uM)	Celecoxib (60uM)	Difference	95% CI of diff.
1	0.8328	0.7992	-0.0336	-0.3211 to 0.2539
2	1.175	1.029	-0.1457	-0.4331 to 0.1418
3	1.39	0.9967	-0.3933	-0.6808 to -0.1058
4	1.679	0.8143	-0.8649	-1.152 to -0.5774
5	1.954	0.8271	-1.127	-1.414 to -0.8392
Row Factor	Difference	t	P value	Summary
1	-0.0336	0.4359	P > 0.05	ns
2	-0.1457	1.89	P > 0.05	ns
3	-0.3933	5.102	P<0.001	***
4	-0.8649	11.22	P<0.001	***
5	-1.127	14.62	P<0.001	***
Celecoxib (10uM) vs Celecoxib (90uM)
Row Factor	Celecoxib (10uM)	Celecoxib (90uM)	Difference	95% CI of diff.
1	0.8328	0.8102	-0.0226	-0.3101 to 0.2649
2	1.175	0.9092	-0.2657	-0.5531 to 0.02181
3	1.39	0.8237	-0.5663	-0.8538 to -0.2788
4	1.679	0.7299	-0.9493	-1.237 to -0.6618
5	1.954	0.6724	-1.281	-1.569 to -0.9939
Row Factor	Difference	t	P value	Summary
1	-0.0226	0.2932	P > 0.05	ns
2	-0.2657	3.446	P<0.01	**
3	-0.5663	7.346	P<0.001	***
4	-0.9493	12.31	P<0.001	***
5	-1.281	16.62	P<0.001	***
Celecoxib (10uM) vs Celecoxib (120uM)
Row Factor	Celecoxib (10uM)	Celecoxib (120uM)	Difference	95% CI of diff.
1	0.8328	0.7984	-0.03436	-0.3218 to 0.2531
2	1.175	0.7276	-0.4472	-0.7347 to -0.1597
3	1.39	0.6982	-0.6918	-0.9792 to -0.4043
4	1.679	0.44	-1.239	-1.527 to -0.9517
5	1.954	0.3986	-1.555	-1.843 to -1.268
Row Factor	Difference	t	P value	Summary
1	-0.03436	0.4457	P > 0.05	ns
2	-0.4472	5.801	P<0.001	***
3	-0.6918	8.974	P<0.001	***
4	-1.239	16.08	P<0.001	***
5	-1.555	20.17	P<0.001	***
Celecoxib (20uM) vs Celecoxib (30uM)
Row Factor	Celecoxib (20uM)	Celecoxib (30uM)	Difference	95% CI of diff.
1	0.8006	0.8135	0.0129	-0.2746 to 0.3004
2	1.31	1.311	0.0007433	-0.2867 to 0.2882
3	1.421	1.428	0.006966	-0.2805 to 0.2944
4	1.693	1.662	-0.03145	-0.3189 to 0.2560
5	1.928	1.932	0.003567	-0.2839 to 0.2910
Row Factor	Difference	t	P value	Summary
1	0.0129	0.1673	P > 0.05	ns
2	0.0007433	0.009642	P > 0.05	ns
3	0.006966	0.09037	P > 0.05	ns
4	-0.03145	0.4079	P > 0.05	ns
5	0.003567	0.04627	P > 0.05	ns
Celecoxib (20uM) vs Celecoxib (60uM)
Row Factor	Celecoxib (20uM)	Celecoxib (60uM)	Difference	95% CI of diff.
1	0.8006	0.7992	-0.0014	-0.2889 to 0.2861
2	1.31	1.029	-0.2808	-0.5683 to 0.006655
3	1.421	0.9967	-0.4244	-0.7119 to -0.1369
4	1.693	0.8143	-0.8787	-1.166 to -0.5912
5	1.928	0.8271	-1.101	-1.389 to -0.8136
Row Factor	Difference	t	P value	Summary
1	-0.0014	0.01816	P > 0.05	ns
2	-0.2808	3.643	P<0.01	**
3	-0.4244	5.505	P<0.001	***
4	-0.8787	11.4	P<0.001	***
5	-1.101	14.28	P<0.001	***
Celecoxib (20uM) vs Celecoxib (90uM)
Row Factor	Celecoxib (20uM)	Celecoxib (90uM)	Difference	95% CI of diff.
1	0.8006	0.8102	0.0096	-0.2779 to 0.2971
2	1.31	0.9092	-0.4008	-0.6883 to -0.1133
3	1.421	0.8237	-0.5974	-0.8849 to -0.3099
4	1.693	0.7299	-0.9631	-1.251 to -0.6756
5	1.928	0.6724	-1.256	-1.543 to -0.9684
Row Factor	Difference	t	P value	Summary
1	0.0096	0.1245	P > 0.05	ns
2	-0.4008	5.2	P<0.001	***
3	-0.5974	7.75	P<0.001	***
4	-0.9631	12.49	P<0.001	***
5	-1.256	16.29	P<0.001	***
Celecoxib (20uM) vs Celecoxib (120uM)
Row Factor	Celecoxib (20uM)	Celecoxib (120uM)	Difference	95% CI of diff.
1	0.8006	0.7984	-0.002159	-0.2896 to 0.2853
2	1.31	0.7276	-0.5824	-0.8698 to -0.2949
3	1.421	0.6982	-0.7229	-1.010 to -0.4354
4	1.693	0.44	-1.253	-1.540 to -0.9655
5	1.928	0.3986	-1.53	-1.817 to -1.242
Row Factor	Difference	t	P value	Summary
1	-0.002159	0.028	P > 0.05	ns
2	-0.5824	7.554	P<0.001	***
3	-0.7229	9.377	P<0.001	***
4	-1.253	16.25	P<0.001	***
5	-1.53	19.84	P<0.001	***
Celecoxib (30uM) vs Celecoxib (60uM)
Row Factor	Celecoxib (30uM)	Celecoxib (60uM)	Difference	95% CI of diff.
1	0.8135	0.7992	-0.0143	-0.3018 to 0.2732
2	1.311	1.029	-0.2816	-0.5690 to 0.005912
3	1.428	0.9967	-0.4314	-0.7188 to -0.1439
4	1.662	0.8143	-0.8473	-1.135 to -0.5598
5	1.932	0.8271	-1.105	-1.392 to -0.8172
Row Factor	Difference	t	P value	Summary
1	-0.0143	0.1855	P > 0.05	ns
2	-0.2816	3.653	P<0.01	**
3	-0.4314	5.596	P<0.001	***
4	-0.8473	10.99	P<0.001	***
5	-1.105	14.33	P<0.001	***
Celecoxib (30uM) vs Celecoxib (90uM)
Row Factor	Celecoxib (30uM)	Celecoxib (90uM)	Difference	95% CI of diff.
1	0.8135	0.8102	-0.0033	-0.2908 to 0.2842
2	1.311	0.9092	-0.4016	-0.6890 to -0.1141
3	1.428	0.8237	-0.6044	-0.8918 to -0.3169
4	1.662	0.7299	-0.9317	-1.219 to -0.6442
5	1.932	0.6724	-1.259	-1.547 to -0.9719
Row Factor	Difference	t	P value	Summary
1	-0.0033	0.04281	P > 0.05	ns
2	-0.4016	5.209	P<0.001	***
3	-0.6044	7.84	P<0.001	***
4	-0.9317	12.09	P<0.001	***
5	-1.259	16.34	P<0.001	***
Celecoxib (30uM) vs Celecoxib (120uM)
Row Factor	Celecoxib (30uM)	Celecoxib (120uM)	Difference	95% CI of diff.
1	0.8135	0.7984	-0.01506	-0.3025 to 0.2724
2	1.311	0.7276	-0.5831	-0.8706 to -0.2956
3	1.428	0.6982	-0.7298	-1.017 to -0.4424
4	1.662	0.44	-1.222	-1.509 to -0.9341
5	1.932	0.3986	-1.533	-1.821 to -1.246
Row Factor	Difference	t	P value	Summary
1	-0.01506	0.1953	P > 0.05	ns
2	-0.5831	7.564	P<0.001	***
3	-0.7298	9.468	P<0.001	***
4	-1.222	15.85	P<0.001	***
5	-1.533	19.89	P<0.001	***
Celecoxib (60uM) vs Celecoxib (90uM)
Row Factor	Celecoxib (60uM)	Celecoxib (90uM)	Difference	95% CI of diff.
1	0.7992	0.8102	0.011	-0.2765 to 0.2985
2	1.029	0.9092	-0.12	-0.4075 to 0.1675
3	0.9967	0.8237	-0.173	-0.4605 to 0.1145
4	0.8143	0.7299	-0.08441	-0.3719 to 0.2031
5	0.8271	0.6724	-0.1547	-0.4422 to 0.1327
Row Factor	Difference	t	P value	Summary
1	0.011	0.1427	P > 0.05	ns
2	-0.12	1.557	P > 0.05	ns
3	-0.173	2.244	P > 0.05	ns
4	-0.08441	1.095	P > 0.05	ns
5	-0.1547	2.007	P > 0.05	ns
Celecoxib (60uM) vs Celecoxib (120uM)
Row Factor	Celecoxib (60uM)	Celecoxib (120uM)	Difference	95% CI of diff.
1	0.7992	0.7984	-0.0007587	-0.2882 to 0.2867
2	1.029	0.7276	-0.3015	-0.5890 to -0.01405
3	0.9967	0.6982	-0.2985	-0.5859 to -0.01099
4	0.8143	0.44	-0.3743	-0.6618 to -0.08681
5	0.8271	0.3986	-0.4285	-0.7160 to -0.1411
Row Factor	Difference	t	P value	Summary
1	-0.0007587	0.009842	P > 0.05	ns
2	-0.3015	3.912	P<0.001	***
3	-0.2985	3.872	P<0.01	**
4	-0.3743	4.855	P<0.001	***
5	-0.4285	5.559	P<0.001	***
Celecoxib (90uM) vs Celecoxib (120uM)
Row Factor	Celecoxib (90uM)	Celecoxib (120uM)	Difference	95% CI of diff.
1	0.8102	0.7984	-0.01176	-0.2992 to 0.2757
2	0.9092	0.7276	-0.1815	-0.4690 to 0.1059
3	0.8237	0.6982	-0.1255	-0.4129 to 0.1620
4	0.7299	0.44	-0.2899	-0.5774 to -0.002398
5	0.6724	0.3986	-0.2738	-0.5613 to 0.01367
Row Factor	Difference	t	P value	Summary
1	-0.01176	0.1525	P > 0.05	ns
2	-0.1815	2.355	P > 0.05	ns
3	-0.1255	1.628	P > 0.05	ns
4	-0.2899	3.76	P<0.01	**
5	-0.2738	3.552	P<0.01	**

## Sheet: 2way ANOVA of LN229 dose climbi
Parameter
Table Analyzed	LN229 dose climbing experiment
Two-way ANOVA
Source of Variation	% of total variation	P value
Interaction	28.98	< 0.0001
Column Factor	37.32	< 0.0001
Row Factor	30.56	< 0.0001
Source of Variation	P value summary	Significant?
Interaction	***	Yes
Column Factor	***	Yes
Row Factor	***	Yes
Source of Variation	Df	Sum-of-squares	Mean square	F
Interaction	28	5.827	0.2081	26.37
Column Factor	7	7.505	1.072	135.9
Row Factor	4	6.144	1.536	194.6
Residual	80	0.6313	0.007892
Number of missing values	0
Bonferroni posttests
Blank control vs TMZ (250uM)
Row Factor	Blank control	TMZ (250uM)	Difference	95% CI of diff.
1	0.8857	0.8727	-0.013	-0.2835 to 0.2575
2	1.208	1.221	0.0133	-0.2572 to 0.2838
3	1.532	1.506	-0.02593	-0.2964 to 0.2446
4	1.658	1.695	0.03637	-0.2341 to 0.3069
5	2.099	1.991	-0.1077	-0.3782 to 0.1628
Row Factor	Difference	t	P value	Summary
1	-0.013	0.1792	P > 0.05	ns
2	0.0133	0.1834	P > 0.05	ns
3	-0.02593	0.3575	P > 0.05	ns
4	0.03637	0.5014	P > 0.05	ns
5	-0.1077	1.484	P > 0.05	ns
Blank control vs Celecoxib (10uM)
Row Factor	Blank control	Celecoxib (10uM)	Difference	95% CI of diff.
1	0.8857	0.8863	0.000633	-0.2699 to 0.2711
2	1.208	1.2	-0.007987	-0.2785 to 0.2625
3	1.532	1.495	-0.03667	-0.3072 to 0.2338
4	1.658	1.635	-0.0229	-0.2934 to 0.2476
5	2.099	1.986	-0.1126	-0.3831 to 0.1579
Row Factor	Difference	t	P value	Summary
1	0.000633	0.008727	P > 0.05	ns
2	-0.007987	0.1101	P > 0.05	ns
3	-0.03667	0.5055	P > 0.05	ns
4	-0.0229	0.3157	P > 0.05	ns
5	-0.1126	1.552	P > 0.05	ns
Blank control vs Celecoxib (20uM)
Row Factor	Blank control	Celecoxib (20uM)	Difference	95% CI of diff.
1	0.8857	0.9102	0.02453	-0.2460 to 0.2950
2	1.208	1.198	-0.0097	-0.2802 to 0.2608
3	1.532	1.521	-0.0108	-0.2813 to 0.2597
4	1.658	1.671	0.01267	-0.2578 to 0.2832
5	2.099	1.961	-0.138	-0.4085 to 0.1325
Row Factor	Difference	t	P value	Summary
1	0.02453	0.3382	P > 0.05	ns
2	-0.0097	0.1337	P > 0.05	ns
3	-0.0108	0.1489	P > 0.05	ns
4	0.01267	0.1746	P > 0.05	ns
5	-0.138	1.903	P > 0.05	ns
Blank control vs Celecoxib (30uM)
Row Factor	Blank control	Celecoxib (30uM)	Difference	95% CI of diff.
1	0.8857	0.883	-0.0027	-0.2732 to 0.2678
2	1.208	1.171	-0.03723	-0.3077 to 0.2333
3	1.532	1.536	0.0044	-0.2661 to 0.2749
4	1.658	1.668	0.01003	-0.2605 to 0.2805
5	2.099	1.921	-0.1778	-0.4483 to 0.09273
Row Factor	Difference	t	P value	Summary
1	-0.0027	0.03722	P > 0.05	ns
2	-0.03723	0.5133	P > 0.05	ns
3	0.0044	0.06067	P > 0.05	ns
4	0.01003	0.1383	P > 0.05	ns
5	-0.1778	2.451	P > 0.05	ns
Blank control vs Celecoxib (60uM)
Row Factor	Blank control	Celecoxib (60uM)	Difference	95% CI of diff.
1	0.8857	0.8931	0.007367	-0.2631 to 0.2779
2	1.208	1.123	-0.08483	-0.3553 to 0.1857
3	1.532	1.165	-0.3668	-0.6373 to -0.09633
4	1.658	1.161	-0.497	-0.7675 to -0.2265
5	2.099	1.275	-0.8237	-1.094 to -0.5532
Row Factor	Difference	t	P value	Summary
1	0.007367	0.1016	P > 0.05	ns
2	-0.08483	1.17	P > 0.05	ns
3	-0.3668	5.057	P<0.001	***
4	-0.497	6.852	P<0.001	***
5	-0.8237	11.36	P<0.001	***
Blank control vs Celecoxib (90uM)
Row Factor	Blank control	Celecoxib (90uM)	Difference	95% CI of diff.
1	0.8857	0.9085	0.02283	-0.2477 to 0.2933
2	1.208	1.109	-0.09861	-0.3691 to 0.1719
3	1.532	1.037	-0.4952	-0.7657 to -0.2247
4	1.658	0.8363	-0.822	-1.093 to -0.5515
5	2.099	0.7452	-1.354	-1.624 to -1.083
Row Factor	Difference	t	P value	Summary
1	0.02283	0.3147	P > 0.05	ns
2	-0.09861	1.36	P > 0.05	ns
3	-0.4952	6.828	P<0.001	***
4	-0.822	11.33	P<0.001	***
5	-1.354	18.66	P<0.001	***
Blank control vs Celecoxib (120uM)
Row Factor	Blank control	Celecoxib (120uM)	Difference	95% CI of diff.
1	0.8857	0.8926	0.006938	-0.2636 to 0.2774
2	1.208	1.096	-0.1119	-0.3824 to 0.1586
3	1.532	0.878	-0.654	-0.9245 to -0.3835
4	1.658	0.7847	-0.8736	-1.144 to -0.6031
5	2.099	0.497	-1.602	-1.872 to -1.331
Row Factor	Difference	t	P value	Summary
1	0.006938	0.09565	P > 0.05	ns
2	-0.1119	1.542	P > 0.05	ns
3	-0.654	9.016	P<0.001	***
4	-0.8736	12.04	P<0.001	***
5	-1.602	22.08	P<0.001	***
TMZ (250uM) vs Celecoxib (10uM)
Row Factor	TMZ (250uM)	Celecoxib (10uM)	Difference	95% CI of diff.
1	0.8727	0.8863	0.01363	-0.2569 to 0.2841
2	1.221	1.2	-0.02129	-0.2918 to 0.2492
3	1.506	1.495	-0.01073	-0.2812 to 0.2598
4	1.695	1.635	-0.05927	-0.3298 to 0.2112
5	1.991	1.986	-0.0049	-0.2754 to 0.2656
Row Factor	Difference	t	P value	Summary
1	0.01363	0.188	P > 0.05	ns
2	-0.02129	0.2935	P > 0.05	ns
3	-0.01073	0.148	P > 0.05	ns
4	-0.05927	0.8171	P > 0.05	ns
5	-0.0049	0.06755	P > 0.05	ns
TMZ (250uM) vs Celecoxib (20uM)
Row Factor	TMZ (250uM)	Celecoxib (20uM)	Difference	95% CI of diff.
1	0.8727	0.9102	0.03753	-0.2330 to 0.3080
2	1.221	1.198	-0.023	-0.2935 to 0.2475
3	1.506	1.521	0.01513	-0.2554 to 0.2856
4	1.695	1.671	-0.0237	-0.2942 to 0.2468
5	1.991	1.961	-0.03033	-0.3008 to 0.2402
Row Factor	Difference	t	P value	Summary
1	0.03753	0.5175	P > 0.05	ns
2	-0.023	0.3171	P > 0.05	ns
3	0.01513	0.2086	P > 0.05	ns
4	-0.0237	0.3267	P > 0.05	ns
5	-0.03033	0.4182	P > 0.05	ns
TMZ (250uM) vs Celecoxib (30uM)
Row Factor	TMZ (250uM)	Celecoxib (30uM)	Difference	95% CI of diff.
1	0.8727	0.883	0.0103	-0.2602 to 0.2808
2	1.221	1.171	-0.05053	-0.3210 to 0.2200
3	1.506	1.536	0.03033	-0.2402 to 0.3008
4	1.695	1.668	-0.02633	-0.2968 to 0.2442
5	1.991	1.921	-0.0701	-0.3406 to 0.2004
Row Factor	Difference	t	P value	Summary
1	0.0103	0.142	P > 0.05	ns
2	-0.05053	0.6967	P > 0.05	ns
3	0.03033	0.4182	P > 0.05	ns
4	-0.02633	0.3631	P > 0.05	ns
5	-0.0701	0.9664	P > 0.05	ns
TMZ (250uM) vs Celecoxib (60uM)
Row Factor	TMZ (250uM)	Celecoxib (60uM)	Difference	95% CI of diff.
1	0.8727	0.8931	0.02037	-0.2501 to 0.2909
2	1.221	1.123	-0.09813	-0.3686 to 0.1724
3	1.506	1.165	-0.3409	-0.6114 to -0.07040
4	1.695	1.161	-0.5334	-0.8039 to -0.2629
5	1.991	1.275	-0.716	-0.9865 to -0.4455
Row Factor	Difference	t	P value	Summary
1	0.02037	0.2808	P > 0.05	ns
2	-0.09813	1.353	P > 0.05	ns
3	-0.3409	4.7	P<0.001	***
4	-0.5334	7.354	P<0.001	***
5	-0.716	9.871	P<0.001	***
TMZ (250uM) vs Celecoxib (90uM)
Row Factor	TMZ (250uM)	Celecoxib (90uM)	Difference	95% CI of diff.
1	0.8727	0.9085	0.03583	-0.2347 to 0.3063
2	1.221	1.109	-0.1119	-0.3824 to 0.1586
3	1.506	1.037	-0.4693	-0.7398 to -0.1988
4	1.695	0.8363	-0.8584	-1.129 to -0.5879
5	1.991	0.7452	-1.246	-1.516 to -0.9754
Row Factor	Difference	t	P value	Summary
1	0.03583	0.4939	P > 0.05	ns
2	-0.1119	1.543	P > 0.05	ns
3	-0.4693	6.47	P<0.001	***
4	-0.8584	11.83	P<0.001	***
5	-1.246	17.18	P<0.001	***
TMZ (250uM) vs Celecoxib (120uM)
Row Factor	TMZ (250uM)	Celecoxib (120uM)	Difference	95% CI of diff.
1	0.8727	0.8926	0.01994	-0.2506 to 0.2904
2	1.221	1.096	-0.1252	-0.3957 to 0.1453
3	1.506	0.878	-0.6281	-0.8986 to -0.3576
4	1.695	0.7847	-0.91	-1.180 to -0.6395
5	1.991	0.497	-1.494	-1.765 to -1.224
Row Factor	Difference	t	P value	Summary
1	0.01994	0.2749	P > 0.05	ns
2	-0.1252	1.726	P > 0.05	ns
3	-0.6281	8.659	P<0.001	***
4	-0.91	12.55	P<0.001	***
5	-1.494	20.6	P<0.001	***
Celecoxib (10uM) vs Celecoxib (20uM)
Row Factor	Celecoxib (10uM)	Celecoxib (20uM)	Difference	95% CI of diff.
1	0.8863	0.9102	0.0239	-0.2466 to 0.2944
2	1.2	1.198	-0.001713	-0.2722 to 0.2688
3	1.495	1.521	0.02587	-0.2446 to 0.2964
4	1.635	1.671	0.03557	-0.2349 to 0.3061
5	1.986	1.961	-0.02543	-0.2959 to 0.2451
Row Factor	Difference	t	P value	Summary
1	0.0239	0.3295	P > 0.05	ns
2	-0.001713	0.02362	P > 0.05	ns
3	0.02587	0.3566	P > 0.05	ns
4	0.03557	0.4903	P > 0.05	ns
5	-0.02543	0.3506	P > 0.05	ns
Celecoxib (10uM) vs Celecoxib (30uM)
Row Factor	Celecoxib (10uM)	Celecoxib (30uM)	Difference	95% CI of diff.
1	0.8863	0.883	-0.003333	-0.2738 to 0.2672
2	1.2	1.171	-0.02925	-0.2997 to 0.2413
3	1.495	1.536	0.04107	-0.2294 to 0.3116
4	1.635	1.668	0.03293	-0.2376 to 0.3034
5	1.986	1.921	-0.0652	-0.3357 to 0.2053
Row Factor	Difference	t	P value	Summary
1	-0.003333	0.04595	P > 0.05	ns
2	-0.02925	0.4032	P > 0.05	ns
3	0.04107	0.5662	P > 0.05	ns
4	0.03293	0.454	P > 0.05	ns
5	-0.0652	0.8989	P > 0.05	ns
Celecoxib (10uM) vs Celecoxib (60uM)
Row Factor	Celecoxib (10uM)	Celecoxib (60uM)	Difference	95% CI of diff.
1	0.8863	0.8931	0.006734	-0.2638 to 0.2772
2	1.2	1.123	-0.07685	-0.3473 to 0.1937
3	1.495	1.165	-0.3302	-0.6007 to -0.05967
4	1.635	1.161	-0.4741	-0.7446 to -0.2036
5	1.986	1.275	-0.7111	-0.9816 to -0.4406
Row Factor	Difference	t	P value	Summary
1	0.006734	0.09284	P > 0.05	ns
2	-0.07685	1.059	P > 0.05	ns
3	-0.3302	4.552	P<0.001	***
4	-0.4741	6.537	P<0.001	***
5	-0.7111	9.804	P<0.001	***
Celecoxib (10uM) vs Celecoxib (90uM)
Row Factor	Celecoxib (10uM)	Celecoxib (90uM)	Difference	95% CI of diff.
1	0.8863	0.9085	0.02219	-0.2483 to 0.2927
2	1.2	1.109	-0.09063	-0.3611 to 0.1799
3	1.495	1.037	-0.4586	-0.7291 to -0.1881
4	1.635	0.8363	-0.7991	-1.070 to -0.5286
5	1.986	0.7452	-1.241	-1.511 to -0.9705
Row Factor	Difference	t	P value	Summary
1	0.02219	0.306	P > 0.05	ns
2	-0.09063	1.249	P > 0.05	ns
3	-0.4586	6.322	P<0.001	***
4	-0.7991	11.02	P<0.001	***
5	-1.241	17.11	P<0.001	***
Celecoxib (10uM) vs Celecoxib (120uM)
Row Factor	Celecoxib (10uM)	Celecoxib (120uM)	Difference	95% CI of diff.
1	0.8863	0.8926	0.006305	-0.2642 to 0.2768
2	1.2	1.096	-0.1039	-0.3744 to 0.1666
3	1.495	0.878	-0.6173	-0.8878 to -0.3468
4	1.635	0.7847	-0.8507	-1.121 to -0.5802
5	1.986	0.497	-1.489	-1.760 to -1.219
Row Factor	Difference	t	P value	Summary
1	0.006305	0.08693	P > 0.05	ns
2	-0.1039	1.432	P > 0.05	ns
3	-0.6173	8.511	P<0.001	***
4	-0.8507	11.73	P<0.001	***
5	-1.489	20.53	P<0.001	***
Celecoxib (20uM) vs Celecoxib (30uM)
Row Factor	Celecoxib (20uM)	Celecoxib (30uM)	Difference	95% CI of diff.
1	0.9102	0.883	-0.02723	-0.2977 to 0.2433
2	1.198	1.171	-0.02753	-0.2980 to 0.2430
3	1.521	1.536	0.0152	-0.2553 to 0.2857
4	1.671	1.668	-0.002634	-0.2731 to 0.2679
5	1.961	1.921	-0.03977	-0.3103 to 0.2307
Row Factor	Difference	t	P value	Summary
1	-0.02723	0.3755	P > 0.05	ns
2	-0.02753	0.3796	P > 0.05	ns
3	0.0152	0.2096	P > 0.05	ns
4	-0.002634	0.03631	P > 0.05	ns
5	-0.03977	0.5483	P > 0.05	ns
Celecoxib (20uM) vs Celecoxib (60uM)
Row Factor	Celecoxib (20uM)	Celecoxib (60uM)	Difference	95% CI of diff.
1	0.9102	0.8931	-0.01717	-0.2877 to 0.2533
2	1.198	1.123	-0.07513	-0.3456 to 0.1954
3	1.521	1.165	-0.356	-0.6265 to -0.08554
4	1.671	1.161	-0.5097	-0.7802 to -0.2392
5	1.961	1.275	-0.6857	-0.9562 to -0.4152
Row Factor	Difference	t	P value	Summary
1	-0.01717	0.2367	P > 0.05	ns
2	-0.07513	1.036	P > 0.05	ns
3	-0.356	4.909	P<0.001	***
4	-0.5097	7.027	P<0.001	***
5	-0.6857	9.453	P<0.001	***
Celecoxib (20uM) vs Celecoxib (90uM)
Row Factor	Celecoxib (20uM)	Celecoxib (90uM)	Difference	95% CI of diff.
1	0.9102	0.9085	-0.001707	-0.2722 to 0.2688
2	1.198	1.109	-0.08891	-0.3594 to 0.1816
3	1.521	1.037	-0.4844	-0.7549 to -0.2139
4	1.671	0.8363	-0.8347	-1.105 to -0.5642
5	1.961	0.7452	-1.216	-1.486 to -0.9451
Row Factor	Difference	t	P value	Summary
1	-0.001707	0.02354	P > 0.05	ns
2	-0.08891	1.226	P > 0.05	ns
3	-0.4844	6.679	P<0.001	***
4	-0.8347	11.51	P<0.001	***
5	-1.216	16.76	P<0.001	***
Celecoxib (20uM) vs Celecoxib (120uM)
Row Factor	Celecoxib (20uM)	Celecoxib (120uM)	Difference	95% CI of diff.
1	0.9102	0.8926	-0.0176	-0.2881 to 0.2529
2	1.198	1.096	-0.1022	-0.3727 to 0.1683
3	1.521	0.878	-0.6432	-0.9137 to -0.3727
4	1.671	0.7847	-0.8863	-1.157 to -0.6158
5	1.961	0.497	-1.464	-1.734 to -1.193
Row Factor	Difference	t	P value	Summary
1	-0.0176	0.2426	P > 0.05	ns
2	-0.1022	1.409	P > 0.05	ns
3	-0.6432	8.868	P<0.001	***
4	-0.8863	12.22	P<0.001	***
5	-1.464	20.18	P<0.001	***
Celecoxib (30uM) vs Celecoxib (60uM)
Row Factor	Celecoxib (30uM)	Celecoxib (60uM)	Difference	95% CI of diff.
1	0.883	0.8931	0.01007	-0.2604 to 0.2806
2	1.171	1.123	-0.0476	-0.3181 to 0.2229
3	1.536	1.165	-0.3712	-0.6417 to -0.1007
4	1.668	1.161	-0.5071	-0.7776 to -0.2366
5	1.921	1.275	-0.6459	-0.9164 to -0.3754
Row Factor	Difference	t	P value	Summary
1	0.01007	0.1388	P > 0.05	ns
2	-0.0476	0.6562	P > 0.05	ns
3	-0.3712	5.118	P<0.001	***
4	-0.5071	6.991	P<0.001	***
5	-0.6459	8.905	P<0.001	***
Celecoxib (30uM) vs Celecoxib (90uM)
Row Factor	Celecoxib (30uM)	Celecoxib (90uM)	Difference	95% CI of diff.
1	0.883	0.9085	0.02553	-0.2450 to 0.2960
2	1.171	1.109	-0.06138	-0.3319 to 0.2091
3	1.536	1.037	-0.4996	-0.7701 to -0.2291
4	1.668	0.8363	-0.8321	-1.103 to -0.5616
5	1.921	0.7452	-1.176	-1.446 to -0.9053
Row Factor	Difference	t	P value	Summary
1	0.02553	0.3519	P > 0.05	ns
2	-0.06138	0.8462	P > 0.05	ns
3	-0.4996	6.888	P<0.001	***
4	-0.8321	11.47	P<0.001	***
5	-1.176	16.21	P<0.001	***
Celecoxib (30uM) vs Celecoxib (120uM)
Row Factor	Celecoxib (30uM)	Celecoxib (120uM)	Difference	95% CI of diff.
1	0.883	0.8926	0.009638	-0.2609 to 0.2801
2	1.171	1.096	-0.07464	-0.3451 to 0.1959
3	1.536	0.878	-0.6584	-0.9289 to -0.3879
4	1.668	0.7847	-0.8836	-1.154 to -0.6131
5	1.921	0.497	-1.424	-1.694 to -1.153
Row Factor	Difference	t	P value	Summary
1	0.009638	0.1329	P > 0.05	ns
2	-0.07464	1.029	P > 0.05	ns
3	-0.6584	9.077	P<0.001	***
4	-0.8836	12.18	P<0.001	***
5	-1.424	19.63	P<0.001	***
Celecoxib (60uM) vs Celecoxib (90uM)
Row Factor	Celecoxib (60uM)	Celecoxib (90uM)	Difference	95% CI of diff.
1	0.8931	0.9085	0.01546	-0.2550 to 0.2860
2	1.123	1.109	-0.01378	-0.2843 to 0.2567
3	1.165	1.037	-0.1284	-0.3989 to 0.1421
4	1.161	0.8363	-0.325	-0.5955 to -0.05451
5	1.275	0.7452	-0.5299	-0.8004 to -0.2594
Row Factor	Difference	t	P value	Summary
1	0.01546	0.2131	P > 0.05	ns
2	-0.01378	0.19	P > 0.05	ns
3	-0.1284	1.77	P > 0.05	ns
4	-0.325	4.481	P<0.001	***
5	-0.5299	7.306	P<0.001	***
Celecoxib (60uM) vs Celecoxib (120uM)
Row Factor	Celecoxib (60uM)	Celecoxib (120uM)	Difference	95% CI of diff.
1	0.8931	0.8926	-0.0004287	-0.2709 to 0.2701
2	1.123	1.096	-0.02704	-0.2975 to 0.2435
3	1.165	0.878	-0.2872	-0.5577 to -0.01667
4	1.161	0.7847	-0.3766	-0.6471 to -0.1061
5	1.275	0.497	-0.7781	-1.049 to -0.5076
Row Factor	Difference	t	P value	Summary
1	-0.0004287	0.00591	P > 0.05	ns
2	-0.02704	0.3728	P > 0.05	ns
3	-0.2872	3.959	P<0.001	***
4	-0.3766	5.192	P<0.001	***
5	-0.7781	10.73	P<0.001	***
Celecoxib (90uM) vs Celecoxib (120uM)
Row Factor	Celecoxib (90uM)	Celecoxib (120uM)	Difference	95% CI of diff.
1	0.9085	0.8926	-0.01589	-0.2864 to 0.2546
2	1.109	1.096	-0.01326	-0.2838 to 0.2572
3	1.037	0.878	-0.1588	-0.4293 to 0.1117
4	0.8363	0.7847	-0.05156	-0.3221 to 0.2189
5	0.7452	0.497	-0.2482	-0.5187 to 0.02233
Row Factor	Difference	t	P value	Summary
1	-0.01589	0.219	P > 0.05	ns
2	-0.01326	0.1829	P > 0.05	ns
3	-0.1588	2.189	P > 0.05	ns
4	-0.05156	0.7108	P > 0.05	ns
5	-0.2482	3.421	P<0.01	**
