# Supplementary material for: Celecoxib reverses the glioblastoma chemo-resistance to temozolomide through mitochondrial metabolism
Source: Aging (Albany NY). 2021 Sep 8;13(17):21268–82. doi: 10.18632/aging.203443 (PMC8457578; doi:10.18632/aging.203443)
Supplement: Supplementary Table 2 [file aging-13-203443-s002.xls]

## Sheet: 2way ANOVA of LN18
Supplementary Table 2. Statistical analysis of chemo-sensitization experiment.
Parameter
Table Analyzed	LN18
Two-way ANOVA
Source of Variation	% of total variation	P value
Interaction	16.41	< 0.0001
Column Factor	46	< 0.0001
Row Factor	36.34	< 0.0001
Source of Variation	P value summary	Significant?
Interaction	***	Yes
Column Factor	***	Yes
Row Factor	***	Yes
Source of Variation	Df	Sum-of-squares	Mean square	F
Interaction	20	3.677	0.1839	78.26
Column Factor	5	10.31	2.062	877.5
Row Factor	4	8.144	2.036	866.5
Residual	120	0.282	0.00235
Number of missing values	0
Bonferroni posttests
Blank control vs TMZ (250uM)
Row Factor	Blank control	TMZ (250uM)	Difference	95% CI of diff.
1	0.3557	0.3135	-0.04213	-0.1493 to 0.06499
2	0.6577	0.6099	-0.04773	-0.1549 to 0.05939
3	1.071	1.08	0.009366	-0.09776 to 0.1165
4	1.231	1.199	-0.03153	-0.1387 to 0.07559
5	1.273	1.202	-0.0711	-0.1782 to 0.03602
Row Factor	Difference	t	P value	Summary
1	-0.04213	1.374	P > 0.05	ns
2	-0.04773	1.557	P > 0.05	ns
3	0.009366	0.3055	P > 0.05	ns
4	-0.03153	1.029	P > 0.05	ns
5	-0.0711	2.319	P > 0.05	ns
Blank control vs Celecoxib (30uM)
Row Factor	Blank control	Celecoxib (30uM)	Difference	95% CI of diff.
1	0.3557	0.3051	-0.0506	-0.1577 to 0.05652
2	0.6577	0.5902	-0.06747	-0.1746 to 0.03966
3	1.071	1	-0.07067	-0.1778 to 0.03646
4	1.231	1.196	-0.03413	-0.1413 to 0.07299
5	1.273	1.208	-0.06493	-0.1721 to 0.04219
Row Factor	Difference	t	P value	Summary
1	-0.0506	1.651	P > 0.05	ns
2	-0.06747	2.201	P > 0.05	ns
3	-0.07067	2.305	P > 0.05	ns
4	-0.03413	1.113	P > 0.05	ns
5	-0.06493	2.118	P > 0.05	ns
Blank control vs Celecoxib (90uM)
Row Factor	Blank control	Celecoxib (90uM)	Difference	95% CI of diff.
1	0.3557	0.2086	-0.147	-0.2542 to -0.03991
2	0.6577	0.2948	-0.3629	-0.4700 to -0.2557
3	1.071	0.5653	-0.5053	-0.6125 to -0.3982
4	1.231	0.3269	-0.9037	-1.011 to -0.7965
5	1.273	0.2858	-0.9875	-1.095 to -0.8804
Row Factor	Difference	t	P value	Summary
1	-0.147	4.796	P<0.001	***
2	-0.3629	11.84	P<0.001	***
3	-0.5053	16.48	P<0.001	***
4	-0.9037	29.48	P<0.001	***
5	-0.9875	32.21	P<0.001	***
Blank control vs TMZ (250uM) + Celecoxib (30uM)
Row Factor	Blank control	TMZ (250uM) + Celecoxib (30uM)	Difference	95% CI of diff.
1	0.3557	0.2491	-0.1066	-0.2137 to 0.0005249
2	0.6577	0.4035	-0.2542	-0.3613 to -0.1471
3	1.071	0.6201	-0.4506	-0.5577 to -0.3434
4	1.231	0.8603	-0.3703	-0.4774 to -0.2631
5	1.273	0.958	-0.3154	-0.4225 to -0.2082
Row Factor	Difference	t	P value	Summary
1	-0.1066	3.477	P<0.01	**
2	-0.2542	8.292	P<0.001	***
3	-0.4506	14.7	P<0.001	***
4	-0.3703	12.08	P<0.001	***
5	-0.3154	10.29	P<0.001	***
Blank control vs TMZ (250uM) + Celecoxib (90uM)
Row Factor	Blank control	TMZ (250uM) + Celecoxib (90uM)	Difference	95% CI of diff.
1	0.3557	0.2086	-0.1471	-0.2542 to -0.03998
2	0.6577	0.2928	-0.3649	-0.4720 to -0.2578
3	1.071	0.4102	-0.6605	-0.7676 to -0.5533
4	1.231	0.2094	-1.021	-1.128 to -0.9141
5	1.273	0.232	-1.041	-1.148 to -0.9342
Row Factor	Difference	t	P value	Summary
1	-0.1471	4.798	P<0.001	***
2	-0.3649	11.9	P<0.001	***
3	-0.6605	21.54	P<0.001	***
4	-1.021	33.31	P<0.001	***
5	-1.041	33.97	P<0.001	***
TMZ (250uM) vs Celecoxib (30uM)
Row Factor	TMZ (250uM)	Celecoxib (30uM)	Difference	95% CI of diff.
1	0.3135	0.3051	-0.008466	-0.1156 to 0.09866
2	0.6099	0.5902	-0.01973	-0.1269 to 0.08739
3	1.08	1	-0.08003	-0.1872 to 0.02709
4	1.199	1.196	-0.0026	-0.1097 to 0.1045
5	1.202	1.208	0.006167	-0.1010 to 0.1133
Row Factor	Difference	t	P value	Summary
1	-0.008466	0.2762	P > 0.05	ns
2	-0.01973	0.6437	P > 0.05	ns
3	-0.08003	2.611	P > 0.05	ns
4	-0.0026	0.08482	P > 0.05	ns
5	0.006167	0.2012	P > 0.05	ns
TMZ (250uM) vs Celecoxib (90uM)
Row Factor	TMZ (250uM)	Celecoxib (90uM)	Difference	95% CI of diff.
1	0.3135	0.2086	-0.1049	-0.2120 to 0.002224
2	0.6099	0.2948	-0.3151	-0.4223 to -0.2080
3	1.08	0.5653	-0.5147	-0.6218 to -0.4076
4	1.199	0.3269	-0.8721	-0.9793 to -0.7650
5	1.202	0.2858	-0.9164	-1.024 to -0.8093
Row Factor	Difference	t	P value	Summary
1	-0.1049	3.422	P<0.01	**
2	-0.3151	10.28	P<0.001	***
3	-0.5147	16.79	P<0.001	***
4	-0.8721	28.45	P<0.001	***
5	-0.9164	29.89	P<0.001	***
TMZ (250uM) vs TMZ (250uM) + Celecoxib (30uM)
Row Factor	TMZ (250uM)	TMZ (250uM) + Celecoxib (30uM)	Difference	95% CI of diff.
1	0.3135	0.2491	-0.06447	-0.1716 to 0.04266
2	0.6099	0.4035	-0.2065	-0.3136 to -0.09934
3	1.08	0.6201	-0.4599	-0.5671 to -0.3528
4	1.199	0.8603	-0.3387	-0.4459 to -0.2316
5	1.202	0.958	-0.2443	-0.3514 to -0.1371
Row Factor	Difference	t	P value	Summary
1	-0.06447	2.103	P > 0.05	ns
2	-0.2065	6.735	P<0.001	***
3	-0.4599	15	P<0.001	***
4	-0.3387	11.05	P<0.001	***
5	-0.2443	7.968	P<0.001	***
TMZ (250uM) vs TMZ (250uM) + Celecoxib (90uM)
Row Factor	TMZ (250uM)	TMZ (250uM) + Celecoxib (90uM)	Difference	95% CI of diff.
1	0.3135	0.2086	-0.105	-0.2121 to 0.002158
2	0.6099	0.2928	-0.3172	-0.4243 to -0.2100
3	1.08	0.4102	-0.6698	-0.7770 to -0.5627
4	1.199	0.2094	-0.9897	-1.097 to -0.8825
5	1.202	0.232	-0.9702	-1.077 to -0.8631
Row Factor	Difference	t	P value	Summary
1	-0.105	3.424	P<0.01	**
2	-0.3172	10.35	P<0.001	***
3	-0.6698	21.85	P<0.001	***
4	-0.9897	32.28	P<0.001	***
5	-0.9702	31.65	P<0.001	***
Celecoxib (30uM) vs Celecoxib (90uM)
Row Factor	Celecoxib (30uM)	Celecoxib (90uM)	Difference	95% CI of diff.
1	0.3051	0.2086	-0.09643	-0.2036 to 0.01069
2	0.5902	0.2948	-0.2954	-0.4025 to -0.1883
3	1	0.5653	-0.4347	-0.5418 to -0.3275
4	1.196	0.3269	-0.8695	-0.9767 to -0.7624
5	1.208	0.2858	-0.9226	-1.030 to -0.8154
Row Factor	Difference	t	P value	Summary
1	-0.09643	3.146	P < 0.05	*
2	-0.2954	9.636	P<0.001	***
3	-0.4347	14.18	P<0.001	***
4	-0.8695	28.36	P<0.001	***
5	-0.9226	30.09	P<0.001	***
Celecoxib (30uM) vs TMZ (250uM) + Celecoxib (30uM)
Row Factor	Celecoxib (30uM)	TMZ (250uM) + Celecoxib (30uM)	Difference	95% CI of diff.
1	0.3051	0.2491	-0.056	-0.1631 to 0.05112
2	0.5902	0.4035	-0.1867	-0.2939 to -0.07961
3	1	0.6201	-0.3799	-0.4870 to -0.2728
4	1.196	0.8603	-0.3361	-0.4433 to -0.2290
5	1.208	0.958	-0.2504	-0.3576 to -0.1433
Row Factor	Difference	t	P value	Summary
1	-0.056	1.827	P > 0.05	ns
2	-0.1867	6.091	P<0.001	***
3	-0.3799	12.39	P<0.001	***
4	-0.3361	10.96	P<0.001	***
5	-0.2504	8.169	P<0.001	***
Celecoxib (30uM) vs TMZ (250uM) + Celecoxib (90uM)
Row Factor	Celecoxib (30uM)	TMZ (250uM) + Celecoxib (90uM)	Difference	95% CI of diff.
1	0.3051	0.2086	-0.0965	-0.2036 to 0.01062
2	0.5902	0.2928	-0.2974	-0.4046 to -0.1903
3	1	0.4102	-0.5898	-0.6969 to -0.4827
4	1.196	0.2094	-0.9871	-1.094 to -0.8799
5	1.208	0.232	-0.9764	-1.083 to -0.8692
Row Factor	Difference	t	P value	Summary
1	-0.0965	3.148	P < 0.05	*
2	-0.2974	9.702	P<0.001	***
3	-0.5898	19.24	P<0.001	***
4	-0.9871	32.2	P<0.001	***
5	-0.9764	31.85	P<0.001	***
Celecoxib (90uM) vs TMZ (250uM) + Celecoxib (30uM)
Row Factor	Celecoxib (90uM)	TMZ (250uM) + Celecoxib (30uM)	Difference	95% CI of diff.
1	0.2086	0.2491	0.04043	-0.06669 to 0.1476
2	0.2948	0.4035	0.1087	0.001542 to 0.2158
3	0.5653	0.6201	0.05477	-0.05236 to 0.1619
4	0.3269	0.8603	0.5334	0.4263 to 0.6405
5	0.2858	0.958	0.6721	0.5650 to 0.7793
Row Factor	Difference	t	P value	Summary
1	0.04043	1.319	P > 0.05	ns
2	0.1087	3.545	P<0.01	**
3	0.05477	1.786	P > 0.05	ns
4	0.5334	17.4	P<0.001	***
5	0.6721	21.92	P<0.001	***
Celecoxib (90uM) vs TMZ (250uM) + Celecoxib (90uM)
Row Factor	Celecoxib (90uM)	TMZ (250uM) + Celecoxib (90uM)	Difference	95% CI of diff.
1	0.2086	0.2086	-6.601e-05	-0.1072 to 0.1071
2	0.2948	0.2928	-0.002033	-0.1092 to 0.1051
3	0.5653	0.4102	-0.1551	-0.2623 to -0.04801
4	0.3269	0.2094	-0.1175	-0.2247 to -0.01041
5	0.2858	0.232	-0.0538	-0.1609 to 0.05332
Row Factor	Difference	t	P value	Summary
1	-6.601e-05	0.002153	P > 0.05	ns
2	-0.002033	0.06632	P > 0.05	ns
3	-0.1551	5.06	P<0.001	***
4	-0.1175	3.834	P<0.01	**
5	-0.0538	1.755	P > 0.05	ns
TMZ (250uM) + Celecoxib (30uM) vs TMZ (250uM) + Celecoxib (90uM)
Row Factor	TMZ (250uM) + Celecoxib (30uM)	TMZ (250uM) + Celecoxib (90uM)	Difference	95% CI of diff.
1	0.2491	0.2086	-0.0405	-0.1476 to 0.06662
2	0.4035	0.2928	-0.1107	-0.2178 to -0.003575
3	0.6201	0.4102	-0.2099	-0.3170 to -0.1028
4	0.8603	0.2094	-0.6509	-0.7581 to -0.5438
5	0.958	0.232	-0.7259	-0.8331 to -0.6188
Row Factor	Difference	t	P value	Summary
1	-0.0405	1.321	P > 0.05	ns
2	-0.1107	3.611	P<0.01	**
3	-0.2099	6.847	P<0.001	***
4	-0.6509	21.23	P<0.001	***
5	-0.7259	23.68	P<0.001	***

## Sheet: 2way ANOVA of LN229
Parameter
Table Analyzed	LN229
Two-way ANOVA
Source of Variation	% of total variation	P value
Interaction	5.16	< 0.0001
Column Factor	14.67	< 0.0001
Row Factor	77.56	< 0.0001
Source of Variation	P value summary	Significant?
Interaction	***	Yes
Column Factor	***	Yes
Row Factor	***	Yes
Source of Variation	Df	Sum-of-squares	Mean square	F
Interaction	20	1.16	0.05798	11.85
Column Factor	5	3.296	0.6593	134.7
Row Factor	4	17.43	4.357	890.3
Residual	120	0.5873	0.004894
Number of missing values	0
Bonferroni posttests
Blank control vs TMZ (250uM)
Row Factor	Blank control	TMZ (250uM)	Difference	95% CI of diff.
1	0.2351	0.265	0.0299	-0.1247 to 0.1845
2	0.5622	0.5257	-0.03647	-0.1911 to 0.1181
3	0.9944	0.9642	-0.03017	-0.1848 to 0.1244
4	1.247	1.203	-0.0446	-0.1992 to 0.1100
5	1.439	1.345	-0.0938	-0.2484 to 0.06081
Row Factor	Difference	t	P value	Summary
1	0.0299	0.6758	P > 0.05	ns
2	-0.03647	0.8242	P > 0.05	ns
3	-0.03017	0.6818	P > 0.05	ns
4	-0.0446	1.008	P > 0.05	ns
5	-0.0938	2.12	P > 0.05	ns
Blank control vs Celecoxib (30uM)
Row Factor	Blank control	Celecoxib (30uM)	Difference	95% CI of diff.
1	0.2351	0.2443	0.0092	-0.1454 to 0.1638
2	0.5622	0.4943	-0.0679	-0.2225 to 0.08671
3	0.9944	0.9259	-0.06847	-0.2231 to 0.08614
4	1.247	1.14	-0.1068	-0.2614 to 0.04784
5	1.439	1.33	-0.1091	-0.2637 to 0.04554
Row Factor	Difference	t	P value	Summary
1	0.0092	0.2079	P > 0.05	ns
2	-0.0679	1.535	P > 0.05	ns
3	-0.06847	1.547	P > 0.05	ns
4	-0.1068	2.413	P > 0.05	ns
5	-0.1091	2.465	P > 0.05	ns
Blank control vs Celecoxib (90uM)
Row Factor	Blank control	Celecoxib (90uM)	Difference	95% CI of diff.
1	0.2351	0.1996	-0.03553	-0.1901 to 0.1191
2	0.5622	0.4102	-0.152	-0.3066 to 0.002577
3	0.9944	0.5909	-0.4035	-0.5581 to -0.2489
4	1.247	0.7876	-0.4595	-0.6141 to -0.3049
5	1.439	0.849	-0.5902	-0.7448 to -0.4356
Row Factor	Difference	t	P value	Summary
1	-0.03553	0.8031	P > 0.05	ns
2	-0.152	3.436	P<0.01	**
3	-0.4035	9.119	P<0.001	***
4	-0.4595	10.39	P<0.001	***
5	-0.5902	13.34	P<0.001	***
Blank control vs TMZ (250uM) + Celecoxib (30uM)
Row Factor	Blank control	TMZ (250uM) + Celecoxib (30uM)	Difference	95% CI of diff.
1	0.2351	0.2071	-0.02803	-0.1826 to 0.1266
2	0.5622	0.4019	-0.1603	-0.3149 to -0.005689
3	0.9944	0.7951	-0.1993	-0.3539 to -0.04469
4	1.247	1.007	-0.2402	-0.3948 to -0.08562
5	1.439	1.061	-0.3777	-0.5323 to -0.2231
Row Factor	Difference	t	P value	Summary
1	-0.02803	0.6336	P > 0.05	ns
2	-0.1603	3.623	P<0.01	**
3	-0.1993	4.504	P<0.001	***
4	-0.2402	5.429	P<0.001	***
5	-0.3777	8.536	P<0.001	***
Blank control vs TMZ (250uM) + Celecoxib (90uM)
Row Factor	Blank control	TMZ (250uM) + Celecoxib (90uM)	Difference	95% CI of diff.
1	0.2351	0.1818	-0.0533	-0.2079 to 0.1013
2	0.5622	0.3629	-0.1993	-0.3539 to -0.04469
3	0.9944	0.4949	-0.4995	-0.6541 to -0.3449
4	1.247	0.679	-0.5681	-0.7227 to -0.4135
5	1.439	0.8085	-0.6306	-0.7852 to -0.4760
Row Factor	Difference	t	P value	Summary
1	-0.0533	1.205	P > 0.05	ns
2	-0.1993	4.504	P<0.001	***
3	-0.4995	11.29	P<0.001	***
4	-0.5681	12.84	P<0.001	***
5	-0.6306	14.25	P<0.001	***
TMZ (250uM) vs Celecoxib (30uM)
Row Factor	TMZ (250uM)	Celecoxib (30uM)	Difference	95% CI of diff.
1	0.265	0.2443	-0.0207	-0.1753 to 0.1339
2	0.5257	0.4943	-0.03143	-0.1860 to 0.1232
3	0.9642	0.9259	-0.0383	-0.1929 to 0.1163
4	1.203	1.14	-0.06217	-0.2168 to 0.09244
5	1.345	1.33	-0.01527	-0.1699 to 0.1393
Row Factor	Difference	t	P value	Summary
1	-0.0207	0.4678	P > 0.05	ns
2	-0.03143	0.7104	P > 0.05	ns
3	-0.0383	0.8656	P > 0.05	ns
4	-0.06217	1.405	P > 0.05	ns
5	-0.01527	0.345	P > 0.05	ns
TMZ (250uM) vs Celecoxib (90uM)
Row Factor	TMZ (250uM)	Celecoxib (90uM)	Difference	95% CI of diff.
1	0.265	0.1996	-0.06543	-0.2200 to 0.08918
2	0.5257	0.4102	-0.1156	-0.2702 to 0.03904
3	0.9642	0.5909	-0.3733	-0.5279 to -0.2187
4	1.203	0.7876	-0.4149	-0.5695 to -0.2603
5	1.345	0.849	-0.4964	-0.6510 to -0.3418
Row Factor	Difference	t	P value	Summary
1	-0.06543	1.479	P > 0.05	ns
2	-0.1156	2.612	P > 0.05	ns
3	-0.3733	8.437	P<0.001	***
4	-0.4149	9.378	P<0.001	***
5	-0.4964	11.22	P<0.001	***
TMZ (250uM) vs TMZ (250uM) + Celecoxib (30uM)
Row Factor	TMZ (250uM)	TMZ (250uM) + Celecoxib (30uM)	Difference	95% CI of diff.
1	0.265	0.2071	-0.05793	-0.2125 to 0.09668
2	0.5257	0.4019	-0.1238	-0.2784 to 0.03078
3	0.9642	0.7951	-0.1691	-0.3237 to -0.01452
4	1.203	1.007	-0.1956	-0.3502 to -0.04102
5	1.345	1.061	-0.2839	-0.4385 to -0.1293
Row Factor	Difference	t	P value	Summary
1	-0.05793	1.309	P > 0.05	ns
2	-0.1238	2.799	P < 0.05	*
3	-0.1691	3.823	P<0.01	**
4	-0.1956	4.421	P<0.001	***
5	-0.2839	6.416	P<0.001	***
TMZ (250uM) vs TMZ (250uM) + Celecoxib (90uM)
Row Factor	TMZ (250uM)	TMZ (250uM) + Celecoxib (90uM)	Difference	95% CI of diff.
1	0.265	0.1818	-0.0832	-0.2378 to 0.07141
2	0.5257	0.3629	-0.1628	-0.3174 to -0.008223
3	0.9642	0.4949	-0.4693	-0.6239 to -0.3147
4	1.203	0.679	-0.5235	-0.6781 to -0.3689
5	1.345	0.8085	-0.5368	-0.6914 to -0.3822
Row Factor	Difference	t	P value	Summary
1	-0.0832	1.88	P > 0.05	ns
2	-0.1628	3.68	P<0.01	**
3	-0.4693	10.61	P<0.001	***
4	-0.5235	11.83	P<0.001	***
5	-0.5368	12.13	P<0.001	***
Celecoxib (30uM) vs Celecoxib (90uM)
Row Factor	Celecoxib (30uM)	Celecoxib (90uM)	Difference	95% CI of diff.
1	0.2443	0.1996	-0.04473	-0.1993 to 0.1099
2	0.4943	0.4102	-0.08413	-0.2387 to 0.07048
3	0.9259	0.5909	-0.335	-0.4896 to -0.1804
4	1.14	0.7876	-0.3528	-0.5074 to -0.1982
5	1.33	0.849	-0.4811	-0.6357 to -0.3265
Row Factor	Difference	t	P value	Summary
1	-0.04473	1.011	P > 0.05	ns
2	-0.08413	1.901	P > 0.05	ns
3	-0.335	7.571	P<0.001	***
4	-0.3528	7.973	P<0.001	***
5	-0.4811	10.87	P<0.001	***
Celecoxib (30uM) vs TMZ (250uM) + Celecoxib (30uM)
Row Factor	Celecoxib (30uM)	TMZ (250uM) + Celecoxib (30uM)	Difference	95% CI of diff.
1	0.2443	0.2071	-0.03723	-0.1918 to 0.1174
2	0.4943	0.4019	-0.0924	-0.2470 to 0.06221
3	0.9259	0.7951	-0.1308	-0.2854 to 0.02378
4	1.14	1.007	-0.1335	-0.2881 to 0.02114
5	1.33	1.061	-0.2686	-0.4232 to -0.1140
Row Factor	Difference	t	P value	Summary
1	-0.03723	0.8415	P > 0.05	ns
2	-0.0924	2.088	P > 0.05	ns
3	-0.1308	2.957	P < 0.05	*
4	-0.1335	3.016	P < 0.05	*
5	-0.2686	6.071	P<0.001	***
Celecoxib (30uM) vs TMZ (250uM) + Celecoxib (90uM)
Row Factor	Celecoxib (30uM)	TMZ (250uM) + Celecoxib (90uM)	Difference	95% CI of diff.
1	0.2443	0.1818	-0.0625	-0.2171 to 0.09211
2	0.4943	0.3629	-0.1314	-0.2860 to 0.02321
3	0.9259	0.4949	-0.431	-0.5856 to -0.2764
4	1.14	0.679	-0.4614	-0.6160 to -0.3068
5	1.33	0.8085	-0.5216	-0.6762 to -0.3670
Row Factor	Difference	t	P value	Summary
1	-0.0625	1.413	P > 0.05	ns
2	-0.1314	2.97	P < 0.05	*
3	-0.431	9.741	P<0.001	***
4	-0.4614	10.43	P<0.001	***
5	-0.5216	11.79	P<0.001	***
Celecoxib (90uM) vs TMZ (250uM) + Celecoxib (30uM)
Row Factor	Celecoxib (90uM)	TMZ (250uM) + Celecoxib (30uM)	Difference	95% CI of diff.
1	0.1996	0.2071	0.0075	-0.1471 to 0.1621
2	0.4102	0.4019	-0.008267	-0.1629 to 0.1463
3	0.5909	0.7951	0.2042	0.04956 to 0.3588
4	0.7876	1.007	0.2193	0.06469 to 0.3739
5	0.849	1.061	0.2125	0.05786 to 0.3671
Row Factor	Difference	t	P value	Summary
1	0.0075	0.1695	P > 0.05	ns
2	-0.008267	0.1868	P > 0.05	ns
3	0.2042	4.614	P<0.001	***
4	0.2193	4.956	P<0.001	***
5	0.2125	4.802	P<0.001	***
Celecoxib (90uM) vs TMZ (250uM) + Celecoxib (90uM)
Row Factor	Celecoxib (90uM)	TMZ (250uM) + Celecoxib (90uM)	Difference	95% CI of diff.
1	0.1996	0.1818	-0.01777	-0.1724 to 0.1368
2	0.4102	0.3629	-0.04727	-0.2019 to 0.1073
3	0.5909	0.4949	-0.096	-0.2506 to 0.05861
4	0.7876	0.679	-0.1086	-0.2632 to 0.04601
5	0.849	0.8085	-0.04047	-0.1951 to 0.1141
Row Factor	Difference	t	P value	Summary
1	-0.01777	0.4015	P > 0.05	ns
2	-0.04727	1.068	P > 0.05	ns
3	-0.096	2.17	P > 0.05	ns
4	-0.1086	2.454	P > 0.05	ns
5	-0.04047	0.9146	P > 0.05	ns
TMZ (250uM) + Celecoxib (30uM) vs TMZ (250uM) + Celecoxib (90uM)
Row Factor	TMZ (250uM) + Celecoxib (30uM)	TMZ (250uM) + Celecoxib (90uM)	Difference	95% CI of diff.
1	0.2071	0.1818	-0.02527	-0.1799 to 0.1293
2	0.4019	0.3629	-0.039	-0.1936 to 0.1156
3	0.7951	0.4949	-0.3002	-0.4548 to -0.1456
4	1.007	0.679	-0.3279	-0.4825 to -0.1733
5	1.061	0.8085	-0.2529	-0.4075 to -0.09832
Row Factor	Difference	t	P value	Summary
1	-0.02527	0.571	P > 0.05	ns
2	-0.039	0.8814	P > 0.05	ns
3	-0.3002	6.784	P<0.001	***
4	-0.3279	7.411	P<0.001	***
5	-0.2529	5.716	P<0.001	***
